1 **Characterisation of emergent toxigenic M1<sub>UK</sub> *Streptococcus pyogenes* and associated**  
2 **sublineages**

3 Ho Kwong Li<sup>1,2\*</sup>, Xiangyun Zhi<sup>1,2\*</sup>, Ana Vieira<sup>1,2</sup>, Harry J Whitwell<sup>3,4</sup>, Amelia Schrickler<sup>3</sup>, Elita  
4 Jauneikaite<sup>5,6</sup>, Hanqi Li<sup>1</sup>, Ahmed Yosef<sup>1</sup>, Ivan Andrew<sup>7</sup>, Laurence Game<sup>7</sup>, Claire E. Turner<sup>8</sup>,  
5 Theresa Lamagni<sup>5,9</sup>, Juliana Coelho<sup>5,9</sup>, Shiranee Srisakandan<sup>1,2,5¶</sup>

6

7

8 <sup>1</sup>Department of Infectious Disease, Imperial College London, UK

9 <sup>2</sup>MRC Centre for Molecular Bacteriology & Infection (CMBI), Imperial College London, UK

10 <sup>3</sup>National Phenome Centre and Imperial Clinical Phenotyping Centre, Department of  
11 Metabolism, Digestion and Reproduction, Imperial College London, UK

12 <sup>4</sup>Section of Bioanalytical Chemistry, Division of Systems Medicine, Department of Metabolism,  
13 Digestion and Reproduction, Imperial College London, UK

14 <sup>5</sup>NIHR Health Protection Unit in Healthcare-associated Infection and Antimicrobial resistance,  
15 Imperial College London, UK

16 <sup>6</sup>School of Public Health, Imperial College London, UK

17 <sup>7</sup>Genomics Facility, UKRI-MRC London Institute for Medical Sciences (LMS), Imperial College  
18 London, UK

19 <sup>8</sup>The Florey Institute, School of Biosciences, University of Sheffield, UK

20 <sup>9</sup>Centre for Infections, UK Health Security Agency, London, UK

21 \*contributed equally

22 ¶for correspondence

23

24

25

26 Abstract

27

28 *Emm1 Streptococcus pyogenes* is a successful, globally-distributed epidemic clone that is  
29 regarded as inherently invasive. An *emm1* sublineage, M1<sub>UK</sub>, that expresses increased SpeA  
30 toxin, was associated with increased scarlet fever and invasive infections in England in  
31 2015/2016. Defined by 27 SNPs in the core genome, M1<sub>UK</sub> is now dominant in England. To  
32 more fully characterise M1<sub>UK</sub>, we undertook comparative transcriptomic and proteomic  
33 analyses of M1<sub>UK</sub> and contemporary non-M1<sub>UK</sub> *emm1* strains (M1<sub>global</sub>).

34 Just seven genes were differentially expressed by M1<sub>UK</sub> compared with contemporary M1<sub>global</sub>  
35 strains. In addition to *speA*, five genes in the operon that includes glycerol dehydrogenase  
36 were upregulated in M1<sub>UK</sub> (*gldA*, *mipB/talC*, *pflD*, and *pts* system IIC and IIB components),  
37 while aquaporin (*glpF2*) was downregulated. M1<sub>UK</sub> strains have a stop codon in *gldA*. Deletion  
38 of the *gldA* gene in M1<sub>global</sub> abrogated glycerol dehydrogenase activity, and recapitulated  
39 upregulation of gene expression within the operon that includes *gldA*, consistent with a  
40 feedback effect.

41 Phylogenetic analysis identified two intermediate *emm1* sublineages in England comprising  
42 13/27 (M1<sub>13SNPs</sub>) and 23/27 SNPs (M1<sub>23SNPs</sub>) respectively, that had failed to expand in the  
43 population. Proteomic analysis of these four major phylogenetic *emm1* groups highlighted  
44 sublineage-specific changes in carbohydrate metabolism, protein synthesis and protein  
45 processing; upregulation of SpeA was not observed in chemically-defined medium. In rich  
46 broth however, transcription and secretion of SpeA was upregulated ~10-fold in both M1<sub>23SNPs</sub>  
47 and M1<sub>UK</sub> sublineages, compared with M1<sub>13SNPs</sub> and M1<sub>global</sub>.

48 We conclude that stepwise accumulation of SNPs led to the emergence of M1<sub>UK</sub>. While  
49 increased expression of SpeA is a key indicator of M1<sub>UK</sub> and undoubtedly important, M1<sub>UK</sub>  
50 strains have outcompeted M1<sub>23SNPs</sub> and other *emm* types that produce similar or more  
51 superantigen toxin. We speculate that an accumulation of adaptive SNPs has contributed to  
52 a wider fitness advantage in M1<sub>UK</sub> on an inherently successful *emm1* streptococcal  
53 background.

54 **Data availability**

55 RNAseq. All new RNAseq data are uploaded to the European Nucleotide Archive under  
56 project reference PRJEB58303

57 Genomic data. All genomes listed are available on the European Nucleotide Archive using  
58 accession numbers as listed in the appendix,

59 Proteomes. Proteomic data are available on FigShare 10.6084/m9.figshare.21777809 and will  
60 be uploaded to PRIDE

61

62 **Impact Summary**

63 Although the major *Streptococcus pyogenes* reservoir is in children with pharyngitis and skin  
64 infections, *S. pyogenes* can lead to rarer, invasive infections that are rapidly progressive and  
65 associated with high mortality and morbidity. *Emm1 S. pyogenes* strains are the single most  
66 frequent genotype to cause invasive infections in high income countries and are established  
67 worldwide as an epidemic clone. The M1<sub>UK</sub> *S. pyogenes emm1* sublineage which is defined  
68 by 27 new SNPs in the core genome, and characterised by increased scarlet fever toxin SpeA  
69 production, emerged and rose to dominance over a period of 5-6 years since initial recognition,  
70 outcompeting other *emm1* strains in England. Increased dominance of *emm1* among invasive  
71 infections this winter, on a background of already-increased numbers of *S. pyogenes*  
72 infections, points to a key shift in host-pathogen interaction. We hypothesize that a  
73 combination of pathogen fitness, virulence, and host susceptibility have coalesced to account  
74 for the excess of circulating *S. pyogenes* and *emm1* invasive infections. In this paper we  
75 undertake a systems-based evaluation of M1<sub>UK</sub> in comparison to older non-M1<sub>UK</sub> *emm1*  
76 strains, and identify a number of pathways that are altered in addition to the previously-  
77 reported increased SpeA expression. The emergence of a new sublineage within an already  
78 virulent clone requires ongoing surveillance, and more detailed investigation of the likely  
79 mechanisms leading to increased fitness. The capacity of *S. pyogenes* to cause outbreaks at  
80 national scale highlights a potential need to consider strain-specific public health guidance,  
81 underlining the inherent virulence of this exclusively human pathogen.

82 Introduction

83

84 *Emm1 Streptococcus pyogenes* emerged in the 1980's and spread globally to become the  
85 leading cause of invasive *S. pyogenes* infection throughout the developed world (1,2). The  
86 lineage expanded following a recombination event that conferred increased expression of the  
87 streptolysin O (*slo/nga*) toxin locus, and was associated with specific phage content, including  
88 the phage encoding a superantigen, SpeA (1). More recently, during a period of increased  
89 scarlet fever activity in England, a new sublineage of *emm1 S. pyogenes* (M1<sub>UK</sub>) was detected  
90 and found to have expanded (3). These strains were strongly associated with not only sore  
91 throats and scarlet fever, but also increases in invasive infection (3). The earliest M1<sub>UK</sub> strain  
92 detected to date was in a collection of non-invasive isolates from London in 2010, while the  
93 first invasive strains were detected in England in 2012. By 2016, the M1<sub>UK</sub> sublineage  
94 represented around 80% of all invasive *emm1* isolates in England (3); this rose to 91% by end  
95 of 2020 (4). Despite differing from older *emm1* strains by just 27 core genome SNPs, the new  
96 sublineage was characterised by a ~ten-fold increase in expression and production of the  
97 superantigen SpeA. Since 2019, the M1<sub>UK</sub> lineage has been identified elsewhere in Europe  
98 and North America (5-7).

99

100 *Emm1* strains are the single most dominant cause of invasive *S. pyogenes* infection. In this  
101 work, we set out to characterise the wider phenotype of the new sublineage M1<sub>UK</sub>, and to  
102 compare M1<sub>UK</sub> strains with minor sublineages that appeared briefly as intermediates, although  
103 did not expand to the extent of M1<sub>UK</sub>. We also examined natural mutants of M1<sub>UK</sub> and the  
104 minor sublineages that provide insight into the cost-benefit balance of the changes in this new  
105 highly successful group of *S. pyogenes* M1T1 strains.

106

107

108 Methods

109 *Bacterial strains.* *S. pyogenes* strains used are outlined in Supplementary Tables S1 and S2;  
110 strains stored in 20% glycerol were streaked onto Columbia blood agar (CBA) prior to broth  
111 culture. *S. pyogenes* were cultured in Todd Hewitt Broth (THB, Oxoid, UK) or chemically  
112 defined medium (CDM) comprising iron, phosphate, magnesium, manganese, sodium  
113 acetate, calcium, sodium bicarbonate, L-cysteine, bases, vitamins and amino acids, with or  
114 without different carbon sources (Supplementary Table S3) at 37°C in 5% CO<sub>2</sub>.

115

116 *RNA-sequencing.* RNA was extracted from four different *S. pyogenes* strains from each  
117 lineage (Supplementary Table S1), cultured in THB for six hours corresponding to late-log  
118 growth phase using methods as previously described (3). RNA sequencing of M1<sub>global</sub> and  
119 M1<sub>UK</sub> RNA was undertaken by Novogene, Cambridge, UK and by the MRC London Institute  
120 of Medical Sciences (LMS). Data (deposited in project PRJEB58303) were analyzed  
121 according to published guidelines (8). Briefly, read quality was assessed using FastQC  
122 (<https://www.bioinformatics.babraham.ac.uk/projects/fastqc/>), filtered and trimmed using  
123 trimmomatic (9), and mapped against the MGAS5005 (CP000017) reference genome using  
124 bowtie2 (10) with the highest sensitivity options. The resulting alignments were converted to  
125 sorted BAM files using vcftools (11). Initial visualizations of the sequencing mapping were  
126 performed using the Integrative Genomics Viewer (IGV) (12) including confirmation of *gldA*  
127 disruption. The mapped RNA-seq reads were then transformed into a fragment count per gene  
128 per sample using HT-seq (13) package. Exploratory data analysis (Principal component  
129 analysis and Heatmap of sample-to-sample distances) of the RNAseq data was implemented  
130 and plotted using DESeq2 package (14). Differential expression analysis in each dataset was  
131 performed using three different R packages (DESeq2 (14), EdgeR (15) and limma  
132 (<https://bioconductor.riken.jp/packages/3.0/bioc/html/limma.html>)) with a log<sub>2</sub>fold change of  
133 0.5 and p-adj < 0.05 for M1<sub>global</sub> vs. M1<sub>UK</sub>, and a log<sub>2</sub>fold change of 1 and p-adj < 0.05 for  
134 M1<sub>H1488ΔgldA</sub> vs. M1<sub>H1488</sub>. Only genes DE in two of the three softwares used were considered as

135 DE genes and used in analysis. Prophage regions were predicted using phaster (16), and  
136 curated by visual assessment and blast alignment.

137

138 *Gene transcription studies.* Specific transcript abundance was evaluated by quantitative RT-  
139 PCR using a plasmid standard for each gene and compared with *proS*. For the *gldA* operon  
140 plasmid standard, single amplicons were amplified to create a single linear insert (ProS-*gldA*-  
141 *mipB*-*pflD*-*pts* subunit IIC) that was TA-cloned into plasmid PCR2.1. For *glpF2* and *speA*, the  
142 plasmid standard comprised just *glpF2* and *proS*, or *speA* and *proS* respectively. cDNA  
143 synthesis from *S. pyogenes* RNA was undertaken as previously reported prior to RT-PCR (3);  
144 primers are listed in Supplementary Table S4. Comparisons were subject to analysis in  
145 GraphPad Prism v9. Non-parametric (Mann Whitney U) or t-tests were used;  $p < 0.05$  was  
146 considered significant.

147

148 *Genetic manipulation.* The gene encoding *gldA* was mutated by allelic replacement using the  
149 suicide vector pUCMUT. A 541 bp fragment upstream of *gldA* gene was amplified (forward  
150 primer: 5'-AGCGAATTCTCGCCCAAGATTACGAAGG-3', reverse primer: 5'-  
151 GGGGTACCCGTTGAACTCCTTTATCTGTGATT-3') incorporating 5' EcoRI and 3'KpnI  
152 restriction sites, and cloned into the suicide vector pUCMUT to produce vector pUCMUT<sub>*gldA*UP</sub>.  
153 A 532 bp fragment downstream of the *gldA* gene was amplified (forward primer: 5'-  
154 AACTGCAGCTATTGCAGAGCTGGTGCT-3', reverse primer: 5' -  
155 ACGCGTCGACCGAGTCGATAGGCTAACC-3') incorporating 5' PstI and 3' Sall restriction  
156 sites and cloned into PstI/Sall digested pUCMUT<sub>*gldA*UP</sub> to create pUCMUT<sub>*gldA*KO</sub>. The  
157 construct was introduced into *S. pyogenes* M1<sub>global</sub> strains H1488 (M1<sub>H1488</sub>), and BHS162  
158 (M1<sub>BHS162</sub>) by electroporation and crossed into the chromosome by homologous  
159 recombination. Transformants were selected using kanamycin (400µg/ml). Successful  
160 disruption of the *gldA* gene and insertion of the kanamycin resistance cassette was confirmed

161 by PCR, DNA sequencing and whole genome sequencing of mutated strains M1<sub>H1488DgldA</sub> and  
162 M1<sub>BHS162DgldA</sub> (isolate identifiers H1589 and H2151 respectively).

163

164 *GldA activity assay.* Cell free extracts were prepared from bacteria cultured overnight in  
165 chemically defined medium containing either 0.5% glucose or 0.5% glycerol to A<sub>600</sub> of 0.6-0.7  
166 (or as close to this as feasible). Bacteria were washed, centrifuged and kept on ice for 1h  
167 within an anaerobic jar, then suspended in 10 mM Tris buffer, pH 9. cells were disrupted by  
168 agitation in three 60-second bursts with 0.1 mm glass beads. Beads were allowed to settle,  
169 and the supernatant fluid centrifuged in an Eppendorf microcentrifuge for 30 seconds at  
170 14,000 x g. GldA results in conversion of glycerol + NAD to dihydroxyacetone + NADH +H<sup>+</sup>.  
171 GldA activity was derived from the increase in absorbance at 340 nm resulting from the  
172 reduction of NAD; one unit reduces one micromole of NAD per minute at 25°C and pH 10.0  
173 under the conditions specific (17).

174

175 *Phylogenetic analysis.* *Emm1* genomes used in phylogenetic analysis were from the UK and  
176 are listed in the Supplementary Information. These comprise sequenced non-invasive *emm1*  
177 isolates (n=139) (3); sequenced invasive *emm1* isolates (n=40) from two studies (3,18); 64  
178 invasive *emm1* isolates from the British Society for Antimicrobial Chemotherapy (BSAC)  
179 collection (19); and 23 *emm1* isolates from a hospital outbreak study (20). Two new *emm1*  
180 genomes were sequenced from an additional outbreak and are available from the European  
181 nucleotide archive (Project PRJEB36425: ERS4267588 and ERS4267589). Raw reads were  
182 trimmed using trimmomatic version 0.36 (9) with the default parameters. The SNP calling was  
183 performed by mapping trimmed reads to the complete *emm1.0* MGAS5005 (CP000017)  
184 reference genome using Snippy v4.6.0 (<https://github.com/tseemann/snippy>), with a minimum  
185 coverage of 10, minimum fraction of 0.9, and minimum vcf variant call quality of 100. Gubbins  
186 version 2.4.1 (21) was used to identify and remove recombinant regions from the resulting full  
187 genome alignment file. A maximum likelihood phylogeny was created from core SNPs using  
188 the general time-reversible (GTR) model of nucleotide substitution with the gamma distributed

189 rate heterogeneity implemented in FastTree v2.1.10-4 (22) Phylogenetic trees were visualized  
190 using FigTree v1.4.2 (<http://tree.bio.ed.ac.uk/software/figtree/>) and Microreact  
191 (<https://microreact.org/showcase>) and edited using INKSCAPE (<https://inkscape.org/pt/>).

192

193 *SpeA* expression. Semi-quantitative analysis of *SpeA* expression by *S. pyogenes* cultured in  
194 THB for 16 hours, was undertaken using cell-free culture supernatants concentrated 5X using  
195 Amicon filters, western blotting using a rabbit polyclonal antibody to *SpeA* and comparison  
196 with standard concentrations of r*SpeA* expressed from *Escherichia coli* as previously reported  
197 (3).

198

199 *Proteomics*. In pilot studies, five strains were randomly selected from each of M1<sub>UK</sub> or M1<sub>global</sub>,  
200 cultured in 50mL chemically defined medium (CDM) to A<sub>600</sub> 1.2-1.4 (6 hours) at 37°C with 5%  
201 CO<sub>2</sub>, then cytosolic, cell wall, and supernatant fractions prepared for proteomic analysis. For  
202 proteomic analysis of sublineages, strains were randomly selected from five phylogenetic  
203 branches within each lineage (5 strains per sublineage, 4 sublineages in total). The  
204 supernatant fraction was removed, syringe filtered (Minisart 0.2µM filter, Sartorius, Germany)  
205 and proteins precipitated overnight at 4°C using 10% Trichloroacetic acid precipitation. Cell-  
206 wall- proteins were extracted from the bacterial pellet using 1mL of 30% raffinose,  
207 centrifugation at 10,000 RPM for 5 min, followed by resuspending the pellet in 1mL of cell wall  
208 extraction buffer (960µL 30% Raffinose, 10µL 1M Tris-HCl pH8, 10µL of 10kU/mL  
209 mutanolysin, 10µL 100mg/mL lysozyme, and 10µL protease inhibitor cocktail III (Avantor  
210 VWR, USA), followed by incubation at 37°C for 3 hours with occasional turning, and then  
211 aspiration of cell wall extract supernatant after centrifugation at 13,000 RPM for 10 minutes.  
212 The residual cytosolic fraction was further mechanically lysed via bead beating for 3 cycles for  
213 45 seconds (Lysing Matrix B from MP Bio, USA). The samples of each cellular fraction then  
214 underwent centrifugal concentration using 3kDa filters and buffer exchanged (Amicon Ultra-  
215 15, Millipore, USA) with 50mM Tris buffer at pH8. The samples were then submitted to the



216 Proteomics Facility of the National Phenome Centre (London, UK) for LC MSe (Data to be  
217 deposited in PRIDE; currently deposited in FigShare). Precipitated samples were dissolved in  
218 8M urea, 100mM ammonium bicarbonate (AmBic) by sonicating for 10 minutes in a water  
219 bath. Total protein was determined in all samples by Protein Assay (Protein Assay II, BioRad)  
220 according to the manufacturer's instructions. 20µg of protein was digested by the addition of  
221 40mM chloracetamide, 10mM TCEP (Bondbreaker, ThermoScientific) and 0.2µg of trypsin in  
222 100mM AmBic. Proteins in 8M urea were diluted to 1M urea prior to the addition of trypsin and  
223 all samples left overnight at 37°C. Desalting was performed by acidifying samples to 0.5%  
224 trifluoroacetic acid (TFA) and adding them to a pre-equilibrated uElution HLB desalting plate  
225 (Waters), washing (3x100µl) with 0.5% TFA and eluting with 80% acetonitrile (3x50µl). All  
226 washes were drawn through the plate under vacuum. Desalted peptides were dried completely  
227 at 45°C in a vacuum-centrifuge.

228 For mass-spectrometry analysis, proteins were dissolved in 0.1% formic acid by sonicating in  
229 a water bath for 10 minutes. 0.5µg of peptides were analysed by LC-HDMSE (M-class UHPLC  
230 (Waters), Synaptic G2S (Waters)). Data was searched and processed using Progenesis QI  
231 for Proteomics.

232 Differentially expressed proteins with a fold change threshold of  $\log_2$  1.5 (p value threshold  
233 0.05) were visualized on volcano plots. Enrichment analysis and protein-protein interactions  
234 were performed using STRING (<https://string-db.org/>), a database able to predict direct  
235 (physical) and indirect (functional) associations based on collected data across a range of  
236 experimental and *in silico* protein interactions. Proteins with a percentage identity higher than  
237 90% and a "combined interaction score" higher than 0.7 were used to create a protein network  
238 in which the interaction between two proteins was inferred based on the information available  
239 in the STRING database and colour coded accordingly.

240

241

## 242 Results

243

### 244 Transcriptome of M1<sub>UK</sub> *S. pyogenes*

245 When comparing broth-cultured M1<sub>UK</sub> and M1<sub>global</sub> *S. pyogenes*, significant differential  
246 expression of just seven genes was observed (Table 1). As expected, transcription of SpeA  
247 was upregulated in all M1<sub>UK</sub> strains compared with other M1<sub>global</sub> strains; increased speA  
248 transcription by M1<sub>UK</sub> has previously been confirmed by RT-qPCR of RNA from 135 *emm1*  
249 isolates (3). Unexpectedly, transcription of glpF2, a putative aquaporin (identified as Spy1573  
250 in *emm1* reference strain MGAS5005), was markedly downregulated in M1<sub>UK</sub> strains.  
251 Bioinformatic analysis of the *S. pyogenes* aquaporin gene glpF2 demonstrated similarity to  
252 the glpF3 family of *Lactobacillus plantarum* reported to be associated with both glycerol and  
253 water, but also dihydroxyacetone (DHA) transport (23).

254 The remaining five differentially-expressed transcripts that were upregulated in M1<sub>UK</sub>  
255 represented consecutive open reading frames in an apparent operon that includes glycerol  
256 dehydrogenase (gldA), pyruvate formate lyase (pflD), and a transaldolase-like protein (talC or  
257 mipB) as well as PTS system IIC and IIB components, annotated as cellobiose-specific.

258

259 Table 1. Differentially expressed genes comparing three M1<sub>UK</sub> and three M1<sub>global</sub> strains

| Gene ID       | Gene Name | Description                                   | Average log2foldchange | Average padj | Strand |
|---------------|-----------|-----------------------------------------------|------------------------|--------------|--------|
| M5005_Spy0996 | speA2     | enterotoxin                                   | 2.361                  | 3.731 E-09   | +      |
| M5005_Spy1573 | glpF.2    | glycerol uptake facilitator protein           | -2.423                 | 5.143E-09    | -      |
| M5005_Spy1742 | mipB      | transaldolase                                 | 1.043                  | 0.0002       | -      |
| M5005_Spy1741 | gldA      | glycerol dehydrogenase                        | 1.024                  | 0.0006       |        |
| M5005_Spy1743 | pflD      | formate acetyltransferase                     | 0.963                  | 0.0007       |        |
| M5005_Spy1744 | NA        | PTS system, cellobiose-specific IIC component | 0.653                  | 0.0061       | -      |
| M5005_Spy1745 | NA        | PTS system, cellobiose-specific IIB component | 0.749                  | 0.0204       |        |

260

261 *GldA* operon.

262 A single SNP in the glycerol dehydrogenase gene *gldA* among all M1<sub>UK</sub> strains is known to  
263 introduce a premature stop codon at position 175 of the 362 residue enzyme and is predicted  
264 to result in a truncated protein with abrogated enzyme activity (3). *GldA* is the final open  
265 reading frame in the sequence of genes that was found to be differentially expressed (Figure  
266 1A). Differential expression of genes comprising the apparent operon was confirmed using  
267 RT-qPCR (Figure 1B-E). Transcription of the aquaporin gene was evaluated in three strains  
268 from each lineage, and although non significant, there was a 2-fold reduction in transcription  
269 in M1<sub>UK</sub>. (Supplementary Figure S1)

270

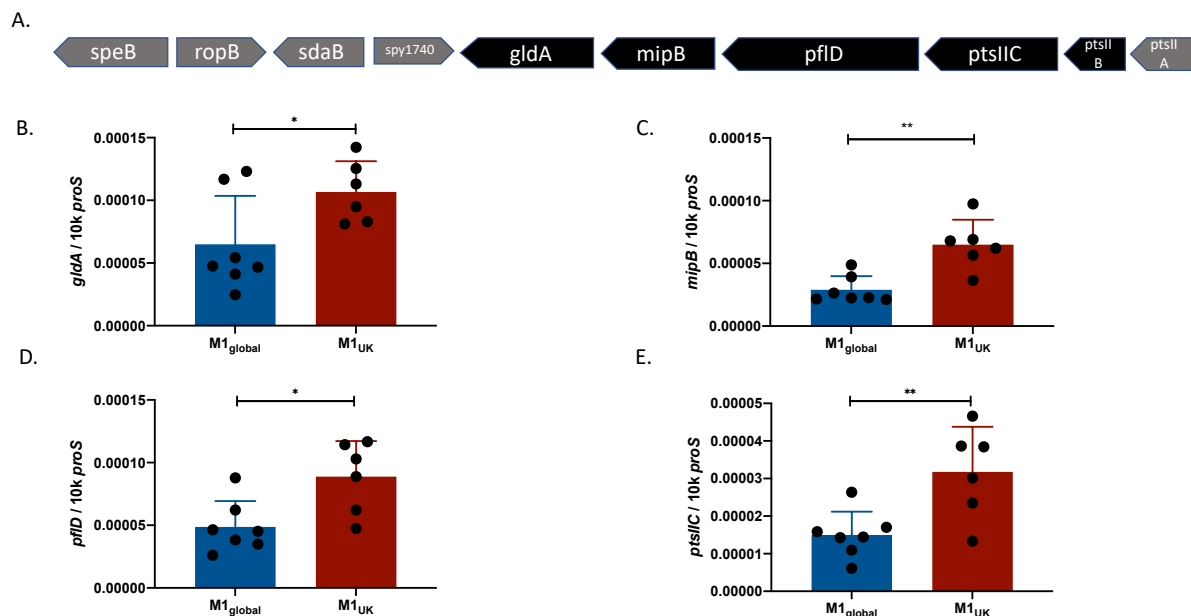

271

272 Figure 1. The genes within the *pfID-mipB-gldA* operon are upregulated in M1<sub>UK</sub>. Five adjacent  
273 genes were found to be upregulated in M1<sub>UK</sub> compared to M1<sub>global</sub> (A). Genes upregulated in  
274 RNAseq are shown in black and include two components of a PTS system annotated as a  
275 PTS system (cellobiose) subunits IIC and IIB. Quantitative real time PCR using RNA from  
276 M1<sub>global</sub> (n=7) and M1<sub>UK</sub> (n=6) strains indicating transcription of *gldA* (B); *mipB*, also known as  
277 *talC* (C); *pfID* (D); and PTS subunit IIC (E). Data points (black dots) represent individual strains  
278 tested as technical triplicates and expressed as copies per 10,000 copies proS. Error bars  
279 show SD of the mean. \*\*p<0.01 using unpaired t-test; \*p<0.05.

280 We hypothesised that the loss of GldA enzyme activity may in some way feedback on  
281 transcription of the adjacent PTS subunit EII genes, as well as *mipB* and *pflD*. To determine  
282 the impact of isolated loss of GldA function in *S. pyogenes*, *gldA* was disrupted through allelic  
283 replacement in M1<sub>global</sub> strain M1<sub>H1488</sub> to create M1<sub>H1488ΔgldA</sub>. A GldA enzyme activity assay was  
284 undertaken, in the presence of glycerol and glucose, to confirm that enzyme function was  
285 present in the parent strain, but abrogated in the mutant (Figure 2A-B); this was replicated  
286 using a second pair of isogenic M1<sub>global</sub> strains (M1<sub>BHS162</sub> and M1<sub>BHS162ΔgldA</sub>). By comparison,  
287 M1<sub>UK</sub> strain BHS581 demonstrated barely detectable *gldA* activity, similar to the knockouts.  
288 RNA from M1<sub>H1488</sub> and the isogenic M1<sub>H1488ΔgldA</sub> was subject to RNAseq to compare the wider  
289 transcriptome of *S. pyogenes* in the absence of a functional *gldA* gene. Surprisingly there were  
290 almost no changes in the transcriptome except in the genes of the putative 'gldA' operon;  
291 deletion of *gldA* abrogated transcription of *gldA* as expected, but was associated with a clear  
292 increase in transcription of *pflD*, *mipB*, and the adjacent PTS system cellobiose-specific IIC  
293 genes. (Table 2). Upregulation of two adjacent genes Spy0123 and Spy0124 (including sloR)  
294 was also observed.

295 Significant downregulation of *gldA* transcription, and upregulation of the adjacent genes was  
296 confirmed by RTqPCR (Figure 2 C- F). Taken together, the data suggested that loss of *gldA*  
297 activity led to upregulation of the entire operon that is concerned with metabolism of  
298 dihydroxyacetone (DHA), fructose 1, 6, phosphate, and pyruvate. *S. pyogenes* has been  
299 reported to use a number of carbon sources, however, under conditions where *emm1* *S.*  
300 *pyogenes* grew well in CDM supplemented with glucose, we were unable to demonstrate any  
301 growth in CDM supplemented with glycerol alone, consistent with other reports (24) (not  
302 shown). Informatic analysis of publicly available genomes from a range of bacterial species  
303 demonstrated remarkable conservation of the genes and organisation of this region in all  
304 members of the streptococcaciae. Whereas other bacterial species possessed the three  
305 genes *mipB* (also annotated as *talC*, for transaldolase), *pflD* and *gldA*, the organisation of  
306 genes differed widely (Figure 2G).

307

308 Table 2. RNAseq comparison of *gldA*-mutant *S. pyogenes* and parent strain

| Gene ID       | Gene Name   | Description                        | Average log <sub>2</sub> foldchange * | Average padj | Strand |
|---------------|-------------|------------------------------------|---------------------------------------|--------------|--------|
| M5005_Spy0008 | divIC       | cell division protein              | -1.0026                               | 0.032        | +      |
| M5005_Spy0123 | NA          | translation initiation inhibitor   | 1.152                                 | 0.016        | +      |
| M5005_Spy0124 | sloR        | transcriptional regulator          | 1.250                                 | 0.0009       |        |
| M5005_Spy1166 | NA          | hypothetical protein               | -1.094                                | 0.0001       | -      |
| M5005_Spy1258 | NA          | putative cytosolic protein         | -1.361                                | 0.019        | -      |
| M5005_Spy1541 | NA          | hypothetical protein               | -1.030                                | 0.018        | -      |
| M5005_Spy1741 | <i>gldA</i> | glycerol dehydrogenase             | -9.212                                | 1.111E-05    | -      |
| M5005_Spy1742 | mipB        | transaldolase                      | 1.366838263                           | 1.91E-03     |        |
| M5005_Spy1743 | pflD        | formate acetyltransferase          | 1.393501703                           | 0.0019       |        |
| M5005_Spy1744 | NA          | PTS system cellobiose-specific IIC | 1.03639459                            | 0.0036       | -      |

309 \*Comparison is made between M1<sub>H1488ΔgldA</sub> and parent strain M1<sub>H1488</sub>; only genes differentially  
 310 expressed by at least log<sub>2</sub> fold value of 1.0 are shown, p<0.05. Genes from the same predicted  
 311 operon are shaded in grey.  
 312  
 313

314

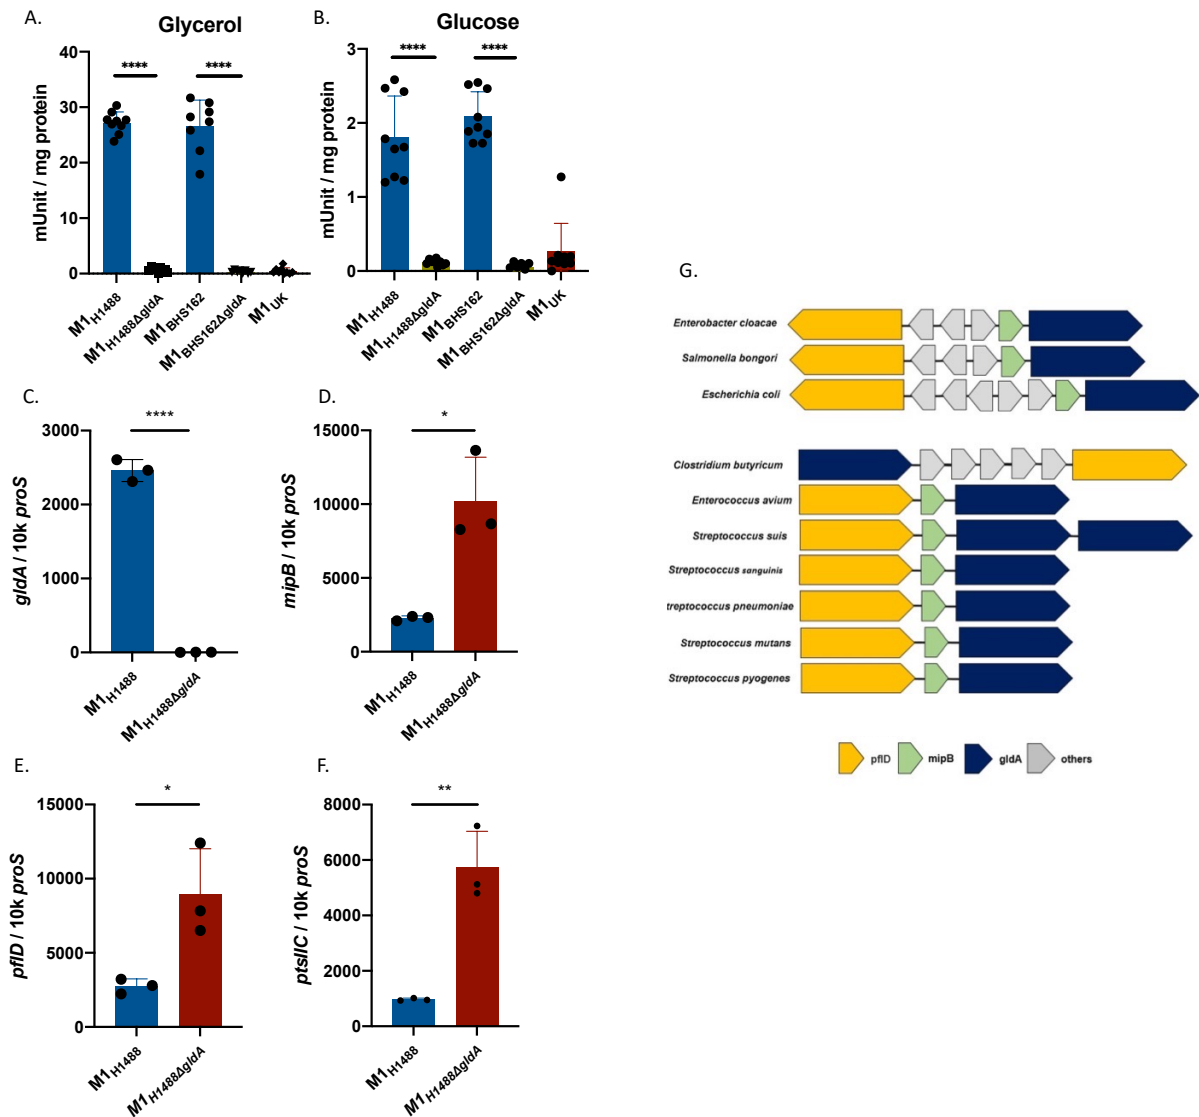

315

316 Figure 2. Loss of *gldA* function is associated with upregulated expression of adjacent genes.

317 Glycerol dehydrogenase activity in *S. pyogenes* M1<sub>global</sub> is abrogated following inactivation of

318 the *gldA* gene, to the level observed in M1<sub>UK</sub>. Activity in the parent strain was greatest when

319 cultured in the presence of glycerol (A) and less in glucose (B). Data show 8 or 9 individual

320 reactions for each strain. Deletion of the *gldA* gene resulted in markedly reduced expression

321 of *gldA*, (C), upregulated transcription of *mipB* (D); *pflD* (E); and PTS component IIC (F). Data

322 show three biological replicates per strain. Error bars show SD of the mean \**p*<0.05; \*\**p*<0.01;

323 \*\*\*\**p*<0.0001 using Mann-Whitney U (A-B) & unpaired t-test (C-F). (G) Arrangement of *pflD*,

324 *mipB*, *gldA* genes in different bacterial species.

325

326 *Intermediate sublineages of emm1 S. pyogenes*

327 M1<sub>UK</sub> strains are distinguished from older *emm1* strains by the presence of 27SNPs (3) (Table  
328 3). Although a number of additional indels are common in M1<sub>UK</sub>, only the 27SNPs define the  
329 new lineage. When analysing genomes from *S. pyogenes* strains isolated in the United  
330 Kingdom, we identified small numbers of strains with either 13 of the 27SNPs, or 23 of the  
331 27SNPs (3). All *emm1* sublineages bar M1<sub>global</sub> possessed three SNPs in the transcriptional  
332 regulator RofA, however the *gldA* stop codon is present only in strains with 23SNPs or  
333 27SNPs. (Table 3). We analysed our original non-invasive *S. pyogenes* WGS alongside other  
334 sequenced UK *emm1* strains (Supplementary Table 2) and enriched for sublineages by  
335 including 10 invasive isolates from each of the following groups; M1<sub>global</sub>; M1<sub>13SNPs</sub>; M1<sub>23SNPs</sub>;  
336 M1<sub>UK</sub>. (Figure 3). As reported before, the earliest M1<sub>UK</sub> strain identified was 2010, however the  
337 earliest M1<sub>13SNPs</sub> strain was 2005, from the BSAC collection.

8 Table 3. SNPs in sublineages.

| Position in MGAS5005 | Gene locus             | Gene  | Product                                       | S/NS | Ref | SNP | M1 <sub>13</sub> SNPs | M1 <sub>19</sub> SNPs <sup>†</sup> | M1 <sub>23</sub> SNPs | M1 <sub>27</sub> SNPs <sup>‡</sup> |
|----------------------|------------------------|-------|-----------------------------------------------|------|-----|-----|-----------------------|------------------------------------|-----------------------|------------------------------------|
| 115646               | M5005_Spy0106          | rofA  | Transcriptional regulator                     | NS   | C   | T   | T                     | T                                  | T                     | T                                  |
| 116162               | M5005_Spy0106          | rofA  | Transcriptional regulator                     | NS   | A   | C   | C                     | C                                  | C                     | C                                  |
| 116163               | M5005_Spy0106          | rofA  | Transcriptional regulator                     | NS   | C   | A   | A                     | A                                  | A                     | A                                  |
| 250832               | M5005_Spy0243          |       | ABC transporter-associated protein            | S    | T   | C   | T                     | T                                  | C                     | C                                  |
| 513254               | M5005_Spy0525          |       | galactose-6-phosphate isomerase LacB          | NS   | G   | T   | T                     | T                                  | T                     | T                                  |
| 528360               | Intergenic             |       | -                                             | -    | A   | T   | A                     | T                                  | T                     | T                                  |
| 563631               | M5005_Spy0566          | sagE  | streptolysin S putative self-immunity protein | NS   | G   | A   | G                     | G                                  | A                     | A                                  |
| 613633               | M5005_Spy0609          |       | phosphoglycerol transferase                   | NS   | T   | C   | C                     | C                                  | C                     | C                                  |
| 626494               | M5005_Spy0623          |       | methyltransferase                             | S    | G   | A   | A                     | A                                  | A                     | A                                  |
| 661707               | M5005_Spy0656          | trmD  | tRNA (guanine-N(1)-)-methyltransferase        | NS   | G   | A   | G                     | A                                  | A                     | A                                  |
| 730823               | M5005_Spy0727          | recJ  | single-stranded-DNA-specific exonuclease      | NS   | C   | T   | T                     | T                                  | T                     | T                                  |
| 784467               | M5005_Spy0779          |       | putative membrane spanning protein            | S    | T   | C   | T                     | T                                  | C                     | C                                  |
| 819098               | M5005_Spy0825          | murB  | UDP-N-acetylenolpyruvoylglucosamine reductase | NS   | G   | A   | G                     | A                                  | A                     | A                                  |
| 923079               | M5005_Spy0933          |       | putative NADH-dependent flavin oxidoreductase | NS   | G   | A   | G                     | A                                  | A                     | A                                  |
| 942633               | M5005_Spy0951          | pstB  | phosphate transport ATP-binding protein       | NS   | G   | T   | G                     | G                                  | G                     | T                                  |
| 983438               | Intergenic/within ssrA |       | -                                             | -    | G   | C   | G                     | G                                  | C                     | C                                  |
| 1082253              | M5005_Spy1108          | metK2 | S-adenosylmethionine synthetase               | NS   | C   | T   | T                     | T                                  | T                     | T                                  |
| 1238124              | M5005_Spy1282          | msrA  | peptide methionine sulfoxide reductase        | NS   | G   | A   | A                     | A                                  | A                     | A                                  |
| 1238673              | M5005_Spy1283          | tlpA  | thiol:disulfide interchange protein           | NS   | G   | A   | A                     | A                                  | A                     | A                                  |
| 1251193              | M5005_Spy1293          |       | hypothetical protein                          | NS   | G   | A   | G                     | G                                  | G                     | A                                  |
| 1373176              | M5005_Spy1400          |       | PTS system, galactose-specific IIB component  | NS   | C   | A   | C                     | C                                  | C                     | A                                  |
| 1407497              | M5005_Spy1439          |       | portal protein                                | NS   | C   | T   | T                     | T                                  | T                     | T                                  |
| 1446116              | M5005_Spy1490          |       | 3-oxoacyl-[acyl-carrier protein] reductase    | S    | C   | T   | T                     | T                                  | T                     | T                                  |
| 1535209              | Intergenic             |       | -                                             | -    | A   | G   | A                     | A                                  | A                     | G                                  |
| 1702540              | M5005_Spy1714          | gldA  | glycerol dehydrogenase                        | STOP | C   | T   | C                     | T                                  | T                     | T                                  |
| 1734749              | M5005_Spy1772          |       | glutamate formimidoyltransferase              | NS   | G   | A   | A                     | A                                  | A                     | A                                  |
| 1828734              | M5005_Spy1860          |       | putative membrane spanning protein            | NS   | G   | A   | G                     | A                                  | A                     | A                                  |

9 <sup>†</sup>Single strain with 19 of the 27SNPs that characterize M1<sub>UK</sub> (not a sublineage); <sup>‡</sup>Lineage with 27SNPs is equivalent to M1<sub>UK</sub>



340 *SpeA* expression by sublineages.

341 Previous comparison had demonstrated ~10-fold greater *speA* gene transcription by non-  
342 invasive M1<sub>UK</sub> isolates compared to non-invasive M1<sub>global</sub> strains (3); we first established that  
343 *SpeA* protein expression was similarly elevated in the same large panel of non-invasive  
344 isolates (Supplementary Figure S2). There was an indication that *SpeA* expression was not  
345 increased in a small number of strains from intermediate lineages. To better understand the  
346 impact of the step-wise changes in SNP content, we examined *SpeA* gene transcription and  
347 protein expression in a new set of strains. To include sufficient numbers of intermediate  
348 sublineage isolates, we used 40 strains from a larger national collection of invasive *emm1* *S.*  
349 *pyogenes* that had been submitted to the reference laboratory and were previously sequenced  
350 (3, 18).

351

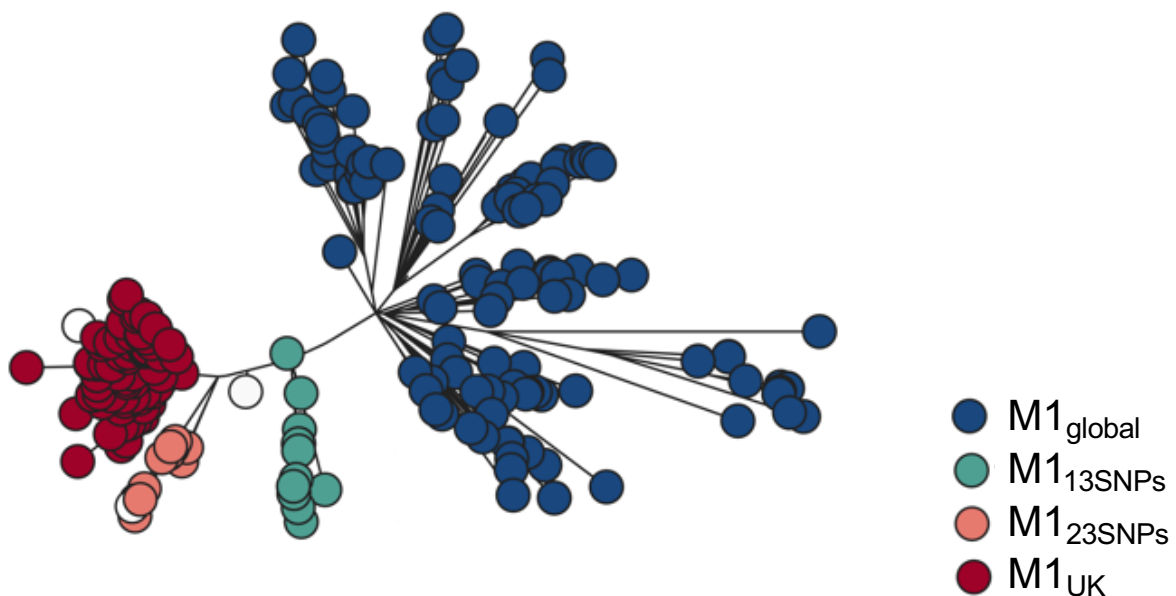

352

353 Figure 3. M1<sub>UK</sub>, M1<sub>global</sub> and two intermediate sublineages Maximum likelihood phylogenetic  
354 tree constructed from core single-nucleotide polymorphisms (without recombination regions)  
355 of 269 invasive and non-invasive *emm1* *S. pyogenes* strains representative of four main  
356 groups (M1<sub>global</sub>, M1<sub>13SNPs</sub>, M1<sub>23SNPs</sub>, M1<sub>UK</sub>). The phylogenetic tree is coloured as described in  
357 the legend. White bubbles represent isogenic strains from two distinct outbreaks with 26 and

358 22 SNPs, respectively and one invasive strain with 19 SNPs. Strains used in the phylogenetic  
359 tree are listed in supplementary table S2.

360

361 *SpeA* transcription was low in all M1<sub>global</sub> and M1<sub>13SNPs</sub> strains, except for the occasional strain  
362 with a mutation in *covRS*, a two component system regulator known to suppress virulence  
363 factors, but which can undergo mutation to confer a more invasive phenotype in *emm1* and  
364 other *S. pyogenes* strains. In contrast, transcription of *SpeA* was high in all invasive strains  
365 with 23 or 27SNPs (Figure 4A). Likewise, *SpeA* protein production differed markedly between  
366 the sublineages; again *SpeA* production was greatest in all invasive strains with 23 or 27SNPs  
367 and was hard to detect in all M1<sub>global</sub> and M1<sub>13SNPs</sub> (Figure 4B). Indeed, the amount of *SpeA*  
368 produced routinely by M1<sub>UK</sub> strains was similar to that produced by M1<sub>global</sub> strains with  
369 mutations in *CovRS*, that is known to repress *SpeA* in *emm1* (25). We did not detect a  
370 difference in expression of other virulence factors such as *SpyCEP*, *SPEB*, or M protein, in  
371 broth culture (not shown). We concluded that the genetic changes required for basal  
372 increased *SpeA* expression in M1<sub>UK</sub> resided in M1<sub>23SNPs</sub> but not M1<sub>13SNPs</sub>.

373

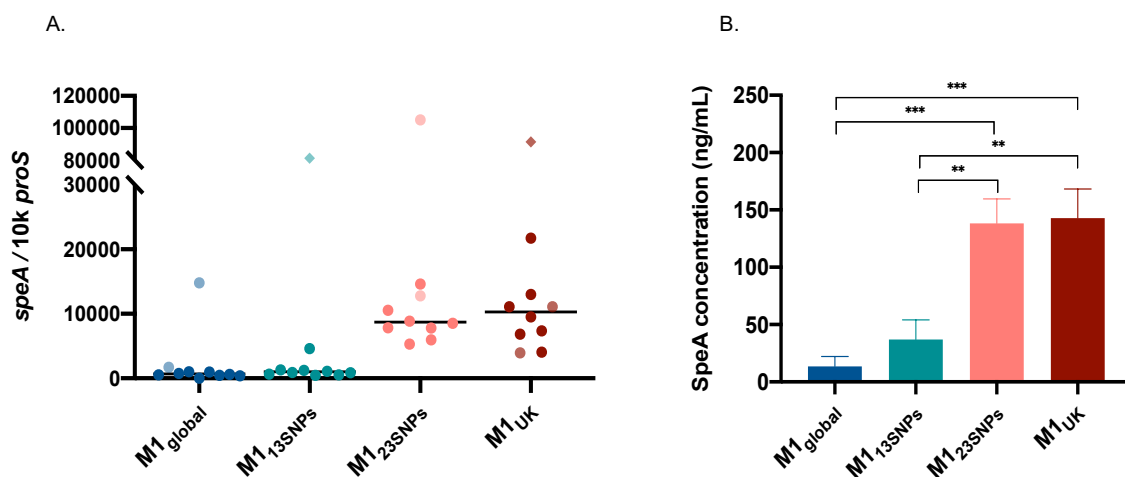

374

375 Figure 4. *SpeA* expression is increased in M1<sub>23SNPs</sub> and M1<sub>UK</sub> sublineages. *SpeA* transcription  
376 (A) using 10 strains from each sublineage is shown (total n=40). Each dot represents a single  
377 strain with lighter shading indicating the presence of *covRS* mutation (all outliers). Two isolates

378 possess both *covRS* and *rgg4* mutations (diamond shape). Solid line represents the median.  
379 There was no statistically significant difference between the sublineages in *speA* transcription,  
380 largely related to the outlying *covRS* mutants in each sublineage. Excluding isolates with  
381 *covRS* mutation a difference was observed between M1<sub>global</sub> and M1<sub>23SNPs</sub> or M1<sub>UK</sub> ( $p < 0.0001$ ),  
382 and a difference between between M1<sub>13SNPs</sub> and M1<sub>23SNPs</sub> or M1<sub>UK</sub>. ( $p = 0.0002$ ). *SpeA* protein  
383 expression (B) comprising 40 isolates (10 in each sublineage) inclusive of *covRS* mutations.  
384 Bar chart shows mean, and SEM. Multiple comparisons test made using one-way ANOVA  
385 (Tukey's).

386

387 Isogenic isolates that differed by just single SNPs were available from two outbreak settings.  
388 Interestingly, in both settings, a single isolate was identified wherein a single SNP from the 27  
389 SNPs that define M1<sub>UK</sub> reverted to wild type. In one daycare outbreak, a non invasive isolate  
390 exhibited only 26 of the 27 SNPs but was otherwise identical to an invasive isolate from the  
391 same cluster; in this case, the SNP in *trmD*, a tRNA (guanine-N(1)-)-methyltransferase, had  
392 reverted to wildtype. This isolate made as much *SpeA* as the isolate with 27 SNPs.

393 In a separate hospital outbreak associated with a fatal case of invasive infection caused by  
394 the M1<sub>23SNPs</sub> sublineage, (20), one isolate from a healthcare worker was identical to 5 other  
395 isolates in the cluster, bar one single SNP. This single SNP represented one of the 23 SNPs  
396 but is present in both M1<sub>13SNPs</sub> and M1<sub>23SNPs</sub>, a phage portal protein (*Spy1439*). This isolate  
397 also produced the same amount of *SpeA* as the parent M1<sub>23SNPs</sub> strain, demonstrating the  
398 SNPs that were dispensible for increased *SpeA* expression.

399 Review of published UK *emm1* genome sequences (19) identified a single strain with 19 of  
400 the 27 SNPs among *emm1* bloodstream isolates. Unlike the sublineage that possessed  
401 23 SNPs, this M1<sub>19SNPs</sub> strain did not produce detectable quantities of *SpeA*, pointing to an  
402 influential role for the four SNPs that differentiate M1<sub>19snp</sub> and the M1<sub>23SNP</sub> sublineage in *SpeA*  
403 expression. Of these four SNPs, two were synonymous SNPs and felt to be unlikely to affect  
404 phenotype; one was a non-synonymous SNP in *sagE*; while the final change was a SNP that  
405 appeared to be intergenic in annotated *emm1* *S. pyogenes* genomes, but lies within the start

406 of the tmRNA *ssrA* (26) upstream of the phage insertion and start site of *SpeA* (Spy0996 in  
407 MGAS5005). RNAseq read abundance in this region did not show a difference between  
408 M1<sub>global</sub> and M1<sub>UK</sub> strains, with the exception of the gene encoding *SpeA*. Abundance of reads  
409 in the 'paratox' (Spy0995) gene, which is transcribed on the opposite strand to *SpeA*, was  
410 increased in two of four M1<sub>UK</sub> strains, but this finding was not consistent.

411

#### 412 *Proteomic analysis of S. pyogenes emm1 sublineages*

413 To screen for lineage-specific difference in proteomes, cell wall, cytosolic, and supernatant  
414 fractions of five randomly selected M1<sub>UK</sub> strains were compared with five M1<sub>global</sub> following  
415 culture in CDM. Though *SpeA* was detected, a significant difference between M1<sub>UK</sub> and  
416 M1<sub>global</sub> supernatants was not observed when strains were cultured in CDM, in contrast to  
417 results (reported above) in Todd Hewitt broth, pointing to a major role for specific culture  
418 conditions in induction of *SpeA*. CDM supernatant from M1<sub>UK</sub> strains demonstrated increased  
419 phage-encoded DNase (*spd3*), acid phosphatase (*lppC*), and a DNA binding protein. CDM  
420 supernatant from M1<sub>global</sub> however demonstrated increased phosphoglycerate mutase and  
421 phosphofructokinase, both of which are linked to carbohydrate utilisation pathways in *S.*  
422 *pyogenes* (Figure 5A & Supplementary Figure S3A) (27). Cell wall fractions demonstrated a  
423 small number of proteins that were differentially expressed in M1<sub>UK</sub> strains. These included a  
424 more than 3-fold increase in *PrsA2* (Spy1732, AAZ52350.1), which controls protein folding  
425 and may operate at the ExPortal (28), and almost 2-fold increases in *GAPDH* and the 10kDa  
426 chaperonin *groS*. (Figure 5B and Supplementary Figure S3B).

427 In M1<sub>global</sub> strains, a number of cytosolic proteins were increased compared to M1<sub>UK</sub>, including  
428 adjacent genes *Spy0438* (*rnc*, Ribonuclease III) and *Spy0439* (*smc*) as well as *mecA*, an  
429 adapter protein and negative regulator of competence; the greatest fold changes were  
430 however seen in *infC*, encoding Initiation Factor 3, *satD*, and a number of proteins linked to  
431 protein secretion (*secA*), maintenance of ribosomal function and RNA. String analysis  
432 highlighted a number of links between phosphoenolpyruvate mutase (*DeoB*), protein synthesis  
433 pathways (*gidA*), and acid tolerance (*satD*). (Figure 5C and Supplementary Figure S3C).

434

435 To screen for differences between all four sublineages (two intermediate and two major  
436 sublineages), five strains from each intermediate sublineage (M1<sub>13SNPs</sub> and M1<sub>23SNPs</sub>) were  
437 randomly selected from appropriate phylogenetic branches as well as 5 new strains from each  
438 of M1<sub>UK</sub> and M1<sub>global</sub>. Fresh cytosolic fractions of the four phylogenetic groups (20 strains) were  
439 prepared and subject to new proteomic analysis. The data were then analysed by comparing  
440 groups in different combinations. When cytosolic preparations from all four sublineages were  
441 compared with one another, fruR expression by M1<sub>23SNPs</sub> was increased in comparison to other  
442 lineages, and lowest in M1<sub>global</sub>, while a network of ribosomal proteins was increased in M1<sub>13SNPs</sub>  
443 (Supplementary Figure S4A). Comparison of cytosolic preparations from new M1<sub>UK</sub> and  
444 M1<sub>global</sub> strains did not identify the same DE features seen previously; however a negative  
445 regulator of competence, mecA, again was increased in M1<sub>global</sub> strains although only by 1.3-  
446 fold (Supplementary Figure 4B). The biggest fold change was a 3.6-fold upregulation of fruR  
447 and 5.87-fold upregulation of mur1.2 a potential autolysin (adjacent to a PTS fructose-specific  
448 IABC system and fruR) in M1<sub>UK</sub> (Figure 6A). As M1<sub>UK</sub> and M1<sub>23SNPs</sub> strains had demonstrated  
449 comparable SpeA production, we proceeded to determine if there was commonality between  
450 these two sublineages by comparing cytosolic proteomes of [M1<sub>UK</sub> and M1<sub>23SNPs</sub>] with [M1<sub>global</sub>  
451 and M1<sub>13SNPs</sub>]. NtpA and B, a V type ATPase, was increased in [M1<sub>global</sub> and M1<sub>13SNPs</sub>]; genes  
452 linked to ligase activity were found to be enriched in string analysis and highest in [M1<sub>global</sub> and  
453 M1<sub>13SNPs</sub>](Figure 6B and Supplementary Figure S4C). When considering M1<sub>global</sub> compared  
454 with all other 3 'new' lineages, carbohydrate metabolism genes were further highlighted,  
455 specifically Phosphotransferase system (PTS) and disaccharide metabolic processes  
456 (Supplementary figure S4D). FruR was four-fold increased in non-M1<sub>global</sub> strains, with  
457 increased FruA in M1<sub>global</sub> strains; a similar pattern was seen for LacR and lacA1/lacA2 (Figure  
458 6C, and Supplementary Figure S4D). A glutamate formiminotransferase  
459 (MGAS5005\_Spy1772) was also increased in M1<sub>global</sub> strains compared with non-M1<sub>global</sub>.  
460 Finally, comparing cytosolic proteins in M1<sub>UK</sub> with all other lineages, just one protein was

461 clearly upregulated in M1<sub>UK</sub>, and this was Spy0848 (ppnK), an ATP-NAD kinase. (Figure 6D  
462 and Supplementary Figure S4E).  
463

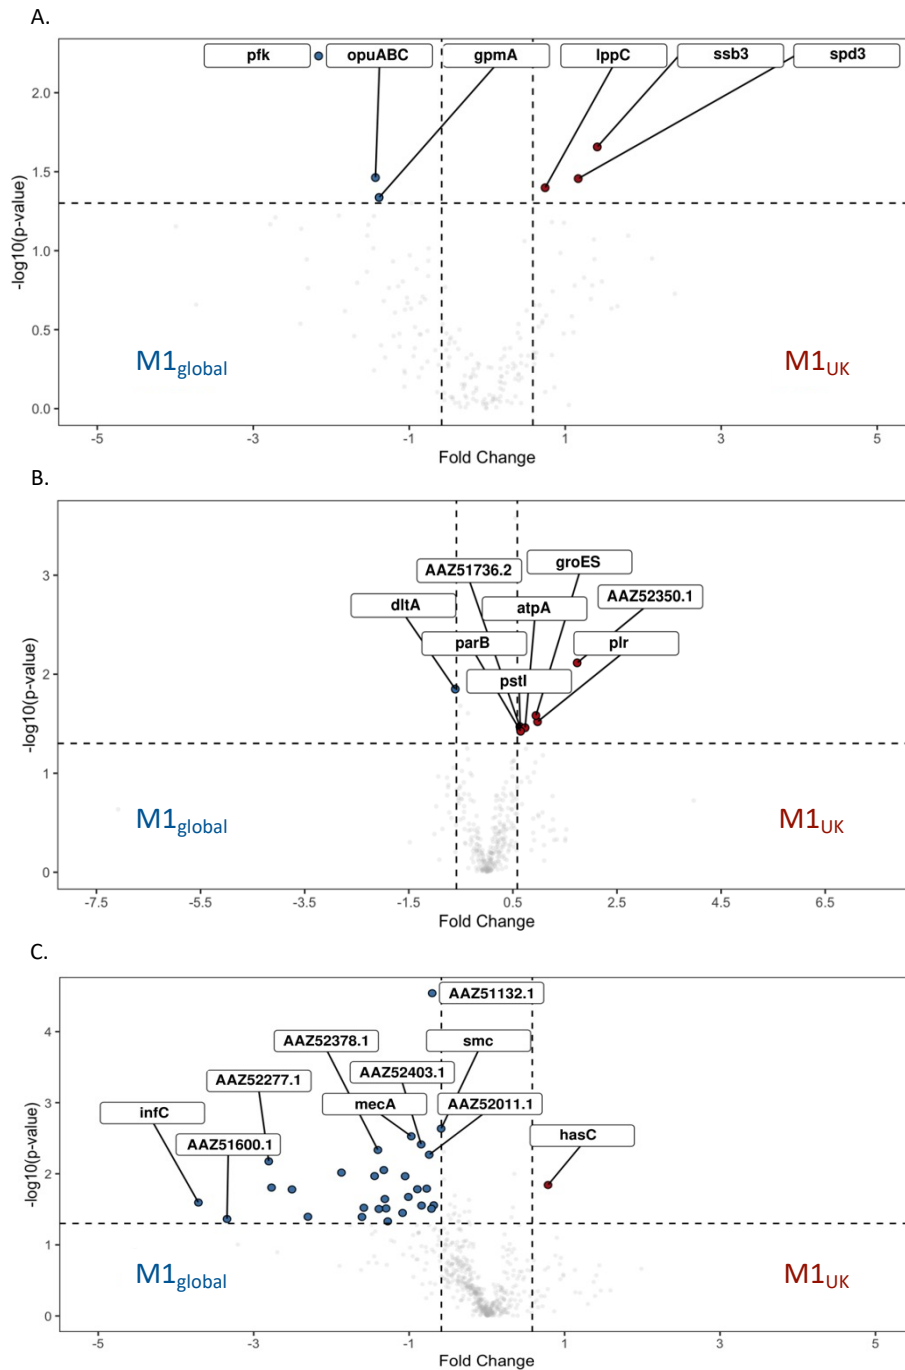

464

465

466 Figure 5: Volcano plots comparing proteins differentially expressed by M1<sub>UK</sub> vs. M1<sub>global</sub>

467 cultured in CDM. Specific fractions examined were Supernatant (A); Cell wall (B); and Cytosol

468 (C). Proteins upregulated in M1<sub>UK</sub> are shown on the right in red. Those upregulated in M1<sub>global</sub>

469 are shown in the left in blue.

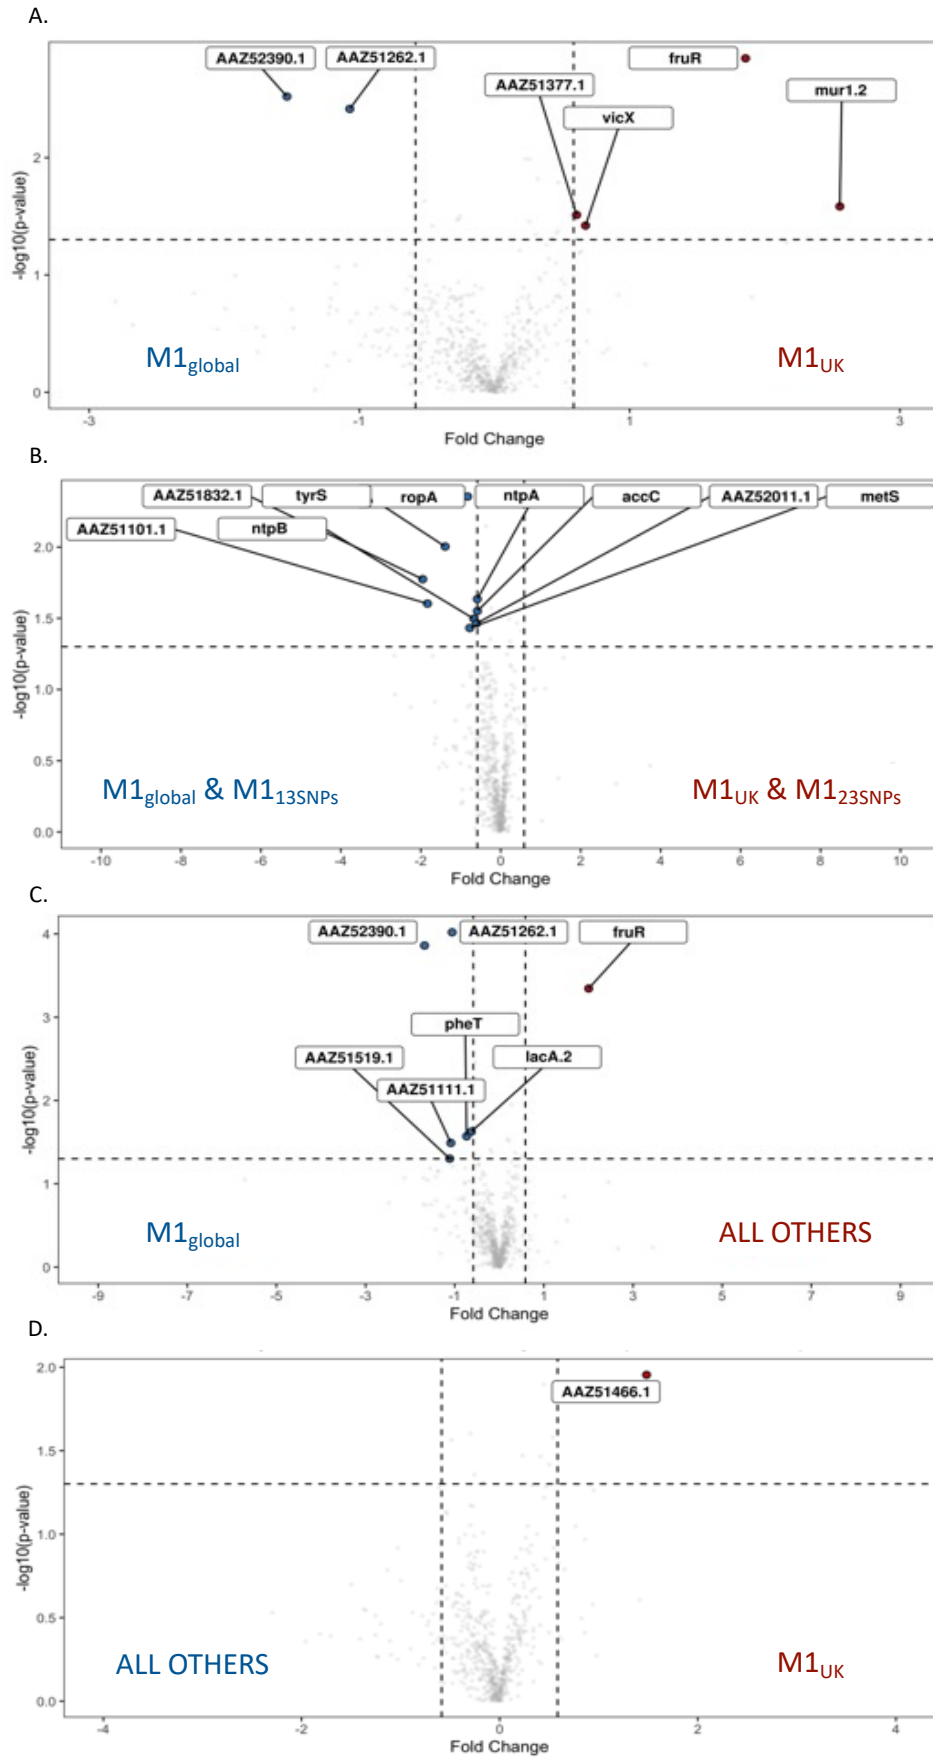

471 Figure 6: Volcano plots comparing proteins differentially expressed by different pairings of  
472 M1<sub>global</sub>, M1<sub>13SNPs</sub>, M1<sub>23SNPs</sub>, and M1<sub>UK</sub> cultured in CDM. Cytosolic fractions only were compared  
473 as follows (A) M1<sub>UK</sub> vs. M1<sub>global</sub> (B) [M1<sub>UK</sub> + M1<sub>23SNPs</sub>] vs. [M1<sub>global</sub> + M1<sub>13SNPs</sub>] (C) All other  
474 sublineages vs. M1<sub>global</sub>, and (D) M1<sub>UK</sub> vs. all other sublineages.

475

476

## 477 Discussion

478 M1<sub>UK</sub> is now the dominant *S. pyogenes emm1* lineage in the United Kingdom, having  
479 expanded during an earlier upsurge in scarlet fever 2014-2016 (3,4). Importantly, *emm1*  
480 strains are inherently invasive and represent the single most frequent *emm* type to cause  
481 invasive infections in the UK (29, 30). As such, any change in the *emm1* lineage that results  
482 in increased fitness is of relevance to public health. In this first systematic study to characterize  
483 the changes in M1<sub>UK</sub> and its associated lineages, we have confirmed the SpeA over-  
484 expression phenotype, and demonstrated that increased SpeA production is restricted to M1<sub>UK</sub>  
485 and an increasingly rare sublineage M1<sub>23SNPs</sub>. The phenotype is manifest in broth culture but  
486 not CDM. M1<sub>UK</sub> is defined by just 27 SNPs in the core genome including 3 SNP in *rofA* and a  
487 stop codon in glycerol dehydrogenase, *gldA*. RNA sequencing demonstrated a difference in  
488 expression of the operon that includes *gldA* and a phosphotransfer system (PTS) EIIC and B  
489 which represents a combined phosphate and sugar transporter, pointing to a potential shift in  
490 metabolism in the new lineage. This was accompanied by a sharp reduction in transcripts for  
491 the aquaporin gene *glpF2*. Preliminary proteomic analysis of strains by sublineage identified  
492 altered carbohydrate pathways related to fructose that may well be important.

493

494 Alterations in expression of *gldA*, *mipB*, *pflD*, and the adjacent PTS system impact on the  
495 glycolytic Embden-Meyerhof Parnas pathway (27) which, in *S. pyogenes*, relies on the  
496 phospho-enolpyruvate PTS system for acquisition of sugars other than glucose, and for  
497 transfer of phosphate ions required for carbon catabolite repression and gene regulation (31).



498 The results indicate that both the stop codon in *gldA* present in M1<sub>UK</sub> and allelic replacement  
499 of *gldA* impact glycerol dehydrogenase activity and result in upregulation of the other genes  
500 in the operon, *mipB* and *pflD*. These are involved in the glycolytic pathway required for  
501 generation and metabolism of pyruvate from glucose; the changes in carbohydrate  
502 metabolism are supported by preliminary proteomic findings that indicate alterations in  
503 fructose pathways. Interestingly, increased transcription in this operon was accompanied by  
504 increased transcription of an adjacent PTS components IIC and IIB when comparing M1<sub>UK</sub> with  
505 M1<sub>global</sub>, and following experimental deletion of *gldA*. This PTS is annotated as being a  
506 cellobiose transporter; systematic experimental disruption of PTS EII systems in *S. pyogenes*  
507 has not shown a key role for these genes, however the precise sugar transported is not known  
508 (31).

509 The role of *gldA* in *S. pyogenes* has not been experimentally examined previously; *gldA* is  
510 reported to catalyse the conversion of glycerol to dihydroxyacetone (DHA) under  
511 microaerophilic or anaerobic conditions, however it is clear that *gldA* may undertake a reverse  
512 role, which is to catalyse DHA to glycerol. This may be of importance since an absence of  
513 *gldA* activity may lead to a build-up of DHA, which when converted to methylglyoxal can be  
514 toxic (32). The upregulation of the PTS system is of interest since these are recognised to be  
515 key players in a phosphorelay process that maintains central carbon catabolite repression of  
516 many virulence systems in *S. pyogenes* (31, 33).

517 The marked ~8-10 fold downregulation of aquaporin *glpF2* (Spy1573) transcription, was  
518 unexpected but may represent an adaptation to the metabolic changes that have arisen in  
519 M1<sub>UK</sub>. There are few reports, if any, relating to *glpF2* in *S. pyogenes* but there is evidence of  
520 functional links to the *pflD* containing operon in enterococci (34). Notably one of the intergenic  
521 SNPs that defines M1<sub>UK</sub> is 39 bp from the start of the Spy1573 gene, though the significance  
522 of this is not yet known. Aquaporins are membrane proteins that function as channels for water  
523 and other uncharged solutes in all forms of life. While mostly considered as channels for water  
524 or glycerol in bacteria, potentially important to osmoregulation, aquaporins also can function  
525 as a channel for DHA. Indeed, there are similarities between *glpF2* of streptococci and *glpF3*

526 of *Lactobacillus plantarum* that points to a possibility for action as a channel for DHA or similar  
527 molecules (23). Research undertaken in related *Lactococcus lactis* has also identified marked  
528 downregulation of glpF2 following osmotic stress (35). Taken together it would seem that the  
529 downregulation of glpF2 may be a necessary adaptation for M1<sub>UK</sub> *S. pyogenes*, although it  
530 may also confer as-yet unknown advantage.

531

532 The upregulation of SpeA expression by M1<sub>UK</sub> is clearly of importance to virulence particularly  
533 in interaction with the human host, and those who have not yet mounted an immune response  
534 to the secreted toxins of this species. There is good evidence that superantigens such as  
535 SpeA undermine development of the adaptive host immune response to *S. pyogenes* through  
536 promotion of a dysregulated T cell response associated with B cell death (36, 37). SpeA has  
537 also been shown to promote carriage of *S. pyogenes* in the nasopharynx of transgenic mice  
538 (38). To date, the expression of SpeA has only been measured in broth culture and we do not  
539 know if the upregulation in M1<sub>UK</sub> might differ *in vivo*. Recent epidemiological studies found a  
540 high (44%) secondary infection rate in schoolchildren and household contacts of a case of  
541 scarlet fever caused by M1<sub>UK</sub>, pointing to a potential transmission advantage compared with  
542 other *S. pyogenes* lineages (39). We identified sublineage-specific altered expression of SpeA  
543 allowing us to highlight the genetic changes likely to account for this. Importantly, the three  
544 SNPs identified in the major regulator RofA do not alone account for the SpeA phenotype  
545 since these SNPs are present in M1<sub>13SNPs</sub> although we cannot discount a role for these in the  
546 wider success of this lineage. While the genetic changes required for increased SpeA  
547 expression do not reside in M1<sub>13SNPs</sub>, they do reside in M1<sub>23SNPs</sub>, and strains with reversion of  
548 single SNPs pointed to a potential key role for the SNP in *ssrA* in SpeA upregulation. The  
549 amount of SpeA made by M1<sub>UK</sub> and M1<sub>23SNPs</sub> was augmented to the level of M1<sub>global</sub> *covRS*  
550 mutants yet presumably without the fitness burden of *covRS* mutation that might impair  
551 pharyngeal carriage (40).

552

553 There are a number of limitations to our study. Firstly, investigation of the *gldA* operon is in its  
554 early stages; it is possible that the stop codon mutation in *gldA* confers an additional  
555 phenotype that is not recapitulated by *gldA* gene deletion, while the metabolic pathways that  
556 include *gldA*, *mipB*, and *pflD* are not fully understood. The roles of *glpF2* and the PTS EII  
557 system that is upregulated are also not understood; any role in transfer of DHA for example  
558 has not been experimentally addressed. The proteomic studies are preliminary and require  
559 both validation and repetition using richer media, but have provided a rationale for further  
560 study of the role of sugar metabolism in *emm1 S. pyogenes*. Finally, the role of specific SNPs  
561 would necessarily require experimental proof.

562

563 Several European countries are, at the time of writing, affected by epidemic waves of invasive  
564 *S. pyogenes* disease, notably in England, where the leading cause of invasive infection is  
565 *emm1* underlining the importance of understanding pathogenicity and transmission (30, 41).  
566 Importantly however, despite the enhanced production of SpeA by M1<sub>23SNPs</sub>, this intermediate  
567 sublineage did not expand in the manner seen for M1<sub>UK</sub> in England, and was not detected at  
568 all in a 2020 systematic evaluation of >300 invasive *emm1* isolates from England (4). This  
569 suggests that the fitness of M1<sub>UK</sub> has required the additional acquisition of four further SNPs.  
570 These include three non-synonymous SNPs in phosphate transport ATP binding protein, *pstB*;  
571 a PTS galactose-specific IIB component gene; a hypothetical protein; as well as the intergenic  
572 SNP adjacent to *glpF2*. The amount of SpeA produced by M1<sub>UK</sub> strains remains an order of  
573 magnitude lower than the amount produced by the historic *emm1* strain NCTC8198 (42).  
574 Despite this, the new M1<sub>UK</sub> lineage has outcompeted M1<sub>23SNPs</sub> and has replaced older strains  
575 suggesting that the added fitness of M1<sub>UK</sub> may lie beyond the ability to make SpeA.

576

### 577 **Funding**

578 This work was supported by the UK Medical Research Council (grant number MR/P022669/1);  
579 a UKRI (MRC) Research Training Fellowship (HKL); and the NIHR Imperial Biomedical  
580 Research Centre.

581

582 **Acknowledgements**

583 SS acknowledges support from the UK National Institute for Health Research (NIHR) Health  
584 Protection Unit in Healthcare Associated Infections and Antimicrobial Resistance and the  
585 NIHR Imperial Biomedical Research Centre.

586 The authors acknowledge the support of colleagues in the UKRI-MRC LMS and National  
587 Phenome Centre in facilitating sequencing and proteomics.

588

589 **Disclosures**

590 None

591

592 **REFERENCES**

593

594 1. Nasser W, Beres SB, Olsen RJ, Dean MA, Rice KA, Long SW, Kristinsson KG, Gottfredsson  
595 M, Vuopio J, Raisanen K, Caugant DA, Steinbakk M, Low DE, McGeer A, Darenberg J,  
596 Henriques-Normark B, Van Beneden CA, Hoffmann S, Musser JM. Evolutionary pathway to  
597 increased virulence and epidemic group A Streptococcus disease derived from 3,615 genome  
598 sequences. *Proc Natl Acad Sci U S A*. 2014 Apr 29;111(17):E1768-76. doi:  
599 10.1073/pnas.1403138111.

600

601 2. Sumbly, P., Porcella, S.F., Madrigal, A.G., Barbian, K.D., Virtaneva, K., Ricklefs, S.M.,  
602 Sturdevant, D.E., Graham, M.R., Vuopio-Varkila, J., Hoe, N.P. and Musser, J.M., 2005.  
603 Evolutionary origin and emergence of a highly successful clone of serotype M1 group A  
604 Streptococcus involved multiple horizontal gene transfer events. *The Journal of infectious*  
605 *diseases*, 192(5), pp.771-782.

606

607 3. Lynskey NN, Jauneikaite E, Li HK, Zhi X, Turner CE, Mosavie M, Pearson M, Asai M,  
608 Lobkowicz L, Chow JY, Parkhill J, Lamagni T, Chalker VJ, Sriskandan S. Emergence of  
609 dominant toxigenic M1T1 Streptococcus pyogenes clone during increased scarlet fever  
610 activity in England: a population-based molecular epidemiological study. *Lancet Infect Dis*.  
611 2019 Nov;19(11):1209-1218. doi: 10.1016/S1473-3099(19)30446-3.

612

613 4. Zhi X, Li HK, Li H, Loboda Z, Charles S, Vieira A, Huse KK, Jauneikaite E, Coelho  
614 J, Lamagni T, Sriskandan S. Ongoing emergence of M1<sub>UK</sub> lineage among invasive group A  
615 streptococcus isolates in 2020 and use of allele-specific PCR

616 <https://biorxiv.org/cgi/content/short/2022.12.18.520871v1>.

617

- 618 5. Rümke LW, de Gier B, Vestjens SMT, van der Ende A, van Sorge NM, Vlamincx BJM,  
619 Witteveen S, van Santen M, Schouls LM, Kuijper EJ. Dominance of M1<sub>UK</sub> clade among Dutch  
620 M1 *Streptococcus pyogenes*. *Lancet Infect Dis*. 2020 May;20(5):539-540. doi:  
621 10.1016/S1473-3099(20)30278-4.  
622
- 623 6. Demczuk W, Martin I, Domingo FR, MacDonald D, Mulvey MR. Identification of  
624 *Streptococcus pyogenes* M1<sub>UK</sub> clone in Canada. *Lancet Infect Dis*. 2019 Dec;19(12):1284-  
625 1285. doi: 10.1016/S1473-3099(19)30622-X.  
626
- 627 7. Li Y, Nanduri SA, Van Beneden CA, Beall BW. M1<sub>UK</sub> lineage in invasive group A  
628 streptococcus isolates from the USA. *Lancet Infect Dis*. 2020 May;20(5):538-539. doi:  
629 10.1016/S1473-3099(20)30279-6.  
630
- 631 8. Conesa A, Madrigal P, Tarazona S, Gomez-Cabrero D, Cervera A, McPherson A, Wojciech  
632 Szcześniak M, Gaffney DJ, Elo LL, Zhang X, Mortazavi A. A survey of best practices for RNA-  
633 seq data analysis. 2016, 17(13).
- 634 9. Bolger AM, Lohse M, Usadel B. Trimmomatic: a flexible trimmer for Illumina sequence data.  
635 *Bioinformatics*. 2014;30(15):2114-20. doi.org/10.1093/bioinformatics/btu170.
- 636 10. Clausen PT, Aarestrup FM, Lund O. Rapid and precise alignment of raw reads against  
637 redundant databases with KMA. *BMC bioinformatics*. 2018;19(1):1-8.
- 638 11. Danecek P, Auton A, Abecasis G, Albers CA, Banks E, DePristo MA, et al. The variant call  
639 format and VCFtools. *Bioinformatics*. 2011;27(15):2156-8.
- 640 12. Robinson JT, Thorvaldsdóttir H, Winckler W, Guttman M, Lander ES, Getz G, et al.  
641 Integrative genomics viewer. *Nature biotechnology*. 2011;29(1):24-6.
- 642 13. Anders S, Pyl PT, Huber W. HTSeq—a Python framework to work with high-throughput  
643 sequencing data. *bioinformatics*. 2015;31(2):166-9.
- 644 14. Love M, Anders S, Huber W. Differential analysis of count data—the DESeq2 package.  
645 *Genome Biol*. 2014;15(550):10-1186.
- 646 15. Robinson MD, McCarthy DJ, Smyth GK. edgeR: a Bioconductor package for differential  
647 expression analysis of digital gene expression data. *Bioinformatics*. 2010;26(1):139-40.

- 648 16. Arndt D, Grant JR, Marcu A, Sajed T, Pon A, Liang Y, et al. PHASTER: a better, faster  
649 version of the PHAST phage search tool. *Nucleic acids research*. 2016;44(W1):W16-W21.
- 650 17. Lin EC, Magasanik B. The activation of glycerol dehydrogenase from *Aerobacter*  
651 *aerogenes* by monovalent cations. *J Biol Chem*. 1960 Jun;235:1820-3. PMID: 14417009.
- 652 18. Kapatai G, Coelho J, Platt S, Chalker VJ. 2017. Whole genome sequencing of group  
653 A *Streptococcus*: development and evaluation of an automated pipeline for *emm* gene  
654 typing. *PeerJ* 5:e3226 <https://doi.org/10.7717/peerj.3226>.
- 655 19. Turner CE, Holden MTG, Blane B, Horner C, Peacock SJ, Sriskandan S. The Emergence  
656 of Successful *Streptococcus pyogenes* Lineages through Convergent Pathways of Capsule  
657 Loss and Recombination Directing High Toxin Expression. *mBio*. 2019 Dec 10;10(6):e02521-  
658 19. doi: 10.1128/mBio.02521-19. PMID: 31822586; PMCID: PMC6904876.
- 659 20. Sharma H, Ong MR, Ready D, Coelho J, Groves N, Chalker V, Warren S. Real-time whole  
660 genome sequencing to control a *Streptococcus pyogenes* outbreak at a national orthopaedic  
661 hospital. *J Hosp Infect*. 2019 Sep;103(1):21-26. doi: 10.1016/j.jhin.2019.07.003.
- 662 21. Croucher NJ, Page AJ, Connor TR, Delaney AJ, Keane JA, Bentley SD, Parkhill J, Harris  
663 SR. 2015. Rapid phylogenetic analysis of large samples of recombinant bacterial whole  
664 genome sequences using Gubbins. *Nucleic Acids Res* 43:e15.
- 665 22. Price, M.N., Dehal, P.S., and Arkin, A.P. (2009) FastTree: Computing Large Minimum-  
666 Evolution Trees with Profiles instead of a Distance Matrix. *Molecular Biology and Evolution*  
667 26:1641-1650, doi:10.1093/molbev/msp077.
- 668 23. Bienert GP, Desguin B, Chaumont F, Hols P. Channel-mediated lactic acid transport: a  
669 novel function for aquaglyceroporins in bacteria. *Biochem J*. 2013 Sep 15;454(3):559-70. doi:  
670 10.1042/BJ20130388.
- 671 24. Sundar GS, Islam E, Braza RD, Silver AB, Le Breton Y, Mclver KS. Route of Glucose  
672 Uptake in the Group a *Streptococcus* Impacts SLS-Mediated Hemolysis and Survival in  
673 Human Blood. *Front Cell Infect Microbiol*. 2018 Mar 14;8:71. doi: 10.3389/fcimb.2018.00071.  
674
- 675 25. Sumbly P, Whitney AR, Graviss EA, DeLeo FR, Musser JM. Genome-wide analysis of  
676 group a streptococci reveals a mutation that modulates global phenotype and disease  
677 specificity. *PLoS Pathog*. 2006 Jan;2(1):e5. doi: 10.1371/journal.ppat.0020005.  
678

- 679 26. Rosinski-Chupin I, Sauvage E, Fouet A, Poyart C, Glaser P. Conserved and specific  
680 features of *Streptococcus pyogenes* and *Streptococcus agalactiae* transcriptional landscapes.  
681 BMC Genomics. 2019 Mar 22;20(1):236. doi: 10.1186/s12864-019-5613-5.  
682
- 683 27. Pancholi V, Caparon M. *Streptococcus pyogenes* Metabolism. 2016 Feb 10. In: Ferretti  
684 JJ, Stevens DL, Fischetti VA, editors. *Streptococcus pyogenes: Basic Biology to Clinical*  
685 *Manifestations* [Internet]. Oklahoma City (OK): University of Oklahoma Health Sciences  
686 Center; 2016—. PMID: 26866220.  
687
- 688 28. Wu ZY, Campeau A, Liu CH, Gonzalez DJ, Yamaguchi M, Kawabata S, Lu CH, Lai CY,  
689 Chiu HC, Chang YC. Unique virulence role of post-translocational chaperone PrsA in  
690 shaping *Streptococcus pyogenes* secretome. *Virulence*. 2021 Dec;12(1):2633-2647. doi:  
691 10.1080/21505594.2021.1982501.  
692
- 693 29. Nelson GE, Pondo T, Toews KA, Farley MM, Lindegren ML, Lynfield R, Aragon D, Zansky  
694 SM, Watt JP, Cieslak PR, Angeles K, Harrison LH, Petit S, Beall B, Van Beneden CA.  
695 Epidemiology of Invasive Group A Streptococcal Infections in the United States, 2005-2012.  
696 *Clin Infect Dis*. 2016 Aug 15;63(4):478-86. doi: 10.1093/cid/ciw248.  
697
- 698 30. UK Health Security Agency Group A Streptococcal infections: second update on seasonal  
699 activity in England 2022 to 2023 Updated 15 December 2022.  
700 [https://www.gov.uk/government/publications/group-a-streptococcal-infections-activity-during-](https://www.gov.uk/government/publications/group-a-streptococcal-infections-activity-during-the-2022-to-2023-season/group-a-streptococcal-infections-second-update-on-seasonal-activity-in-england-2022-to-2023)  
701 [the-2022-to-2023-season/group-a-streptococcal-infections-second-update-on-seasonal-](https://www.gov.uk/government/publications/group-a-streptococcal-infections-activity-during-the-2022-to-2023-season/group-a-streptococcal-infections-second-update-on-seasonal-activity-in-england-2022-to-2023)  
702 [activity-in-england-2022-to-2023](https://www.gov.uk/government/publications/group-a-streptococcal-infections-activity-during-the-2022-to-2023-season/group-a-streptococcal-infections-second-update-on-seasonal-activity-in-england-2022-to-2023) (Accessed 16<sup>th</sup> December 2022).  
703
- 704 31. Sundar GS, Islam E, Gera K, Le Breton Y, McIver KS. A PTS EII mutant library in Group  
705 A *Streptococcus* identifies a promiscuous man-family PTS transporter influencing SLS-  
706 mediated hemolysis. *Mol Microbiol*. 2017 Feb;103(3):518-533. doi: 10.1111/mmi.13573.  
707
- 708 32. Subedi KP, Kim I, Kim J, Min B, Park C. Role of GldA in dihydroxyacetone and  
709 methylglyoxal metabolism of *Escherichia coli* K12. *FEMS Microbiol Lett*. 2008 Feb;279(2):180-  
710 7. doi: 10.1111/j.1574-6968.2007.01032.x.  
711
- 712 33. Rom JS, Hart MT, McIver KS. PRD-Containing Virulence Regulators (PCVRs) in  
713 Pathogenic Bacteria. *Front Cell Infect Microbiol*. 2021 Oct 19;11:772874. doi:  
714 10.3389/fcimb.2021.772874.  
715



- 716 34. Doi Y, Ikegami Y. Pyruvate formate-lyase is essential for fumarate-independent anaerobic  
717 glycerol utilization in the *Enterococcus faecalis* strain W11. *J Bacteriol.* 2014  
718 Jul;196(13):2472-80. doi: 10.1128/JB.01512-14.  
719
- 720 35. van der Meulen SB, de Jong A, Kok J. Early Transcriptome Response of *Lactococcus*  
721 *lactis* to Environmental Stresses Reveals Differentially Expressed Small Regulatory RNAs and  
722 tRNAs. *Front Microbiol.* 2017 Sep 14;8:1704. doi: 10.3389/fmicb.2017.01704.  
723
- 724 36. Davies FJ, Olme C, Lynskey NN, Turner CE, Sriskandan S. Streptococcal superantigen-  
725 induced expansion of human tonsil T cells leads to altered T follicular helper cell phenotype,  
726 B cell death and reduced immunoglobulin release. *Clin Exp Immunol.* 2019 Jul;197(1):83-94.  
727 doi: 10.1111/cei.13282.
- 728 37. Dan JM, Havenar-Daughton C, Kendric K, Al-Kolla R, Kaushik K, Rosales SL, Anderson  
729 EL, LaRock CN, Vijayanand P, Seumois G, Layfield D, Cutress RI, Ottensmeier CH,  
730 Lindestam Arlehamn CS, Sette A, Nizet V, Bothwell M, Brigger M, Crotty S. Recurrent group  
731 A *Streptococcus* tonsillitis is an immunosusceptibility disease involving antibody deficiency  
732 and aberrant T<sub>FH</sub> cells. *Sci Transl Med.* 2019 Feb 6;11(478):eaau3776. doi:  
733 10.1126/scitranslmed.aau3776.
- 734 38. Kasper KJ, Zeppa JJ, Wakabayashi AT, Xu SX, Mazzuca DM, Welch I, Baroja ML, Kotb  
735 M, Cairns E, Cleary PP, Haeryfar SM, McCormick JK. Bacterial superantigens promote acute  
736 nasopharyngeal infection by *Streptococcus pyogenes* in a human MHC Class II-dependent  
737 manner. *PLoS Pathog.* 2014 May 29;10(5):e1004155. doi: 10.1371/journal.ppat.1004155.
- 738 39. Cordery R, Purba AK, Begum L, Mills E, Mosavie M, Vieira A, Jauneikaite E, Leung RCY,  
739 Siggins MK, Ready D, Hoffman P, Lamagni T, Sriskandan S. Frequency of transmission,  
740 asymptomatic shedding, and airborne spread of *Streptococcus pyogenes* in schoolchildren  
741 exposed to scarlet fever: a prospective, longitudinal, multicohort, molecular epidemiological,  
742 contact-tracing study in England, UK. *Lancet Microbe.* 2022 May;3(5):e366-e375. doi:  
743 10.1016/S2666-5247(21)00332-3.
- 744 40. Alam FM, Turner CE, Smith K, Wiles S, Sriskandan S. Inactivation of the CovR/S virulence  
745 regulator impairs infection in an improved murine model of *Streptococcus pyogenes* naso-  
746 pharyngeal infection. *PLoS One.* 2013 Apr 25;8(4):e61655. doi:  
747 10.1371/journal.pone.0061655.



748 41. World Health Organization, Increase in invasive Group A streptococcal infections among  
749 children in Europe, including fatalities. [https://www.who.int/europe/news/item/12-12-2022-  
750 increase-in-invasive-group-a-streptococcal-infections-among-children-in-europe--including-  
751 fatalities#:~:text=The%20observed%20increases%20reported%20to,during%20the%20COV  
752 ID%2D19%20pandemic](https://www.who.int/europe/news/item/12-12-2022-increase-in-invasive-group-a-streptococcal-infections-among-children-in-europe--including-fatalities#:~:text=The%20observed%20increases%20reported%20to,during%20the%20COVID%2D19%20pandemic). (Accessed, 14<sup>th</sup> December 2022).

753 42. Sriskandan S, Moyes D, Buttery LK, Krausz T, Evans TJ, Polak J, Cohen J. Streptococcal  
754 pyrogenic exotoxin A release, distribution, and role in a murine model of fasciitis and  
755 multiorgan failure due to *Streptococcus pyogenes*. *J Infect Dis*. 1996 Jun;173(6):1399-407.  
756 doi: 10.1093/infdis/173.6.1399.

757
